# Supplementary material for: Normal Cortical Myelination in Galectin-4-Deficient Mice
Source: MDPI journal article supplement (doi:10.3390/cells11213485), 2022-11-03
Supplement: s1 [file s1]

***Supplementary Material to:***

**Normal Cortical Myelination in Galectin-4-Deficient Mice**

María-Elvira Brocca<sup>1,†</sup>, Arancha Mora-Rubio<sup>1,†</sup>, Elena Alonso-Calviño<sup>2</sup>, Elena Fernández-López<sup>2</sup>, Natalia Díez-Revuelta<sup>1</sup>, David Martos-Puñal<sup>1</sup>, Juan Aguilar<sup>2</sup>, Alonso M Higuero<sup>1,\*</sup> and José Abad-Rodríguez<sup>1,\*</sup>

## Supplementary Figure S1

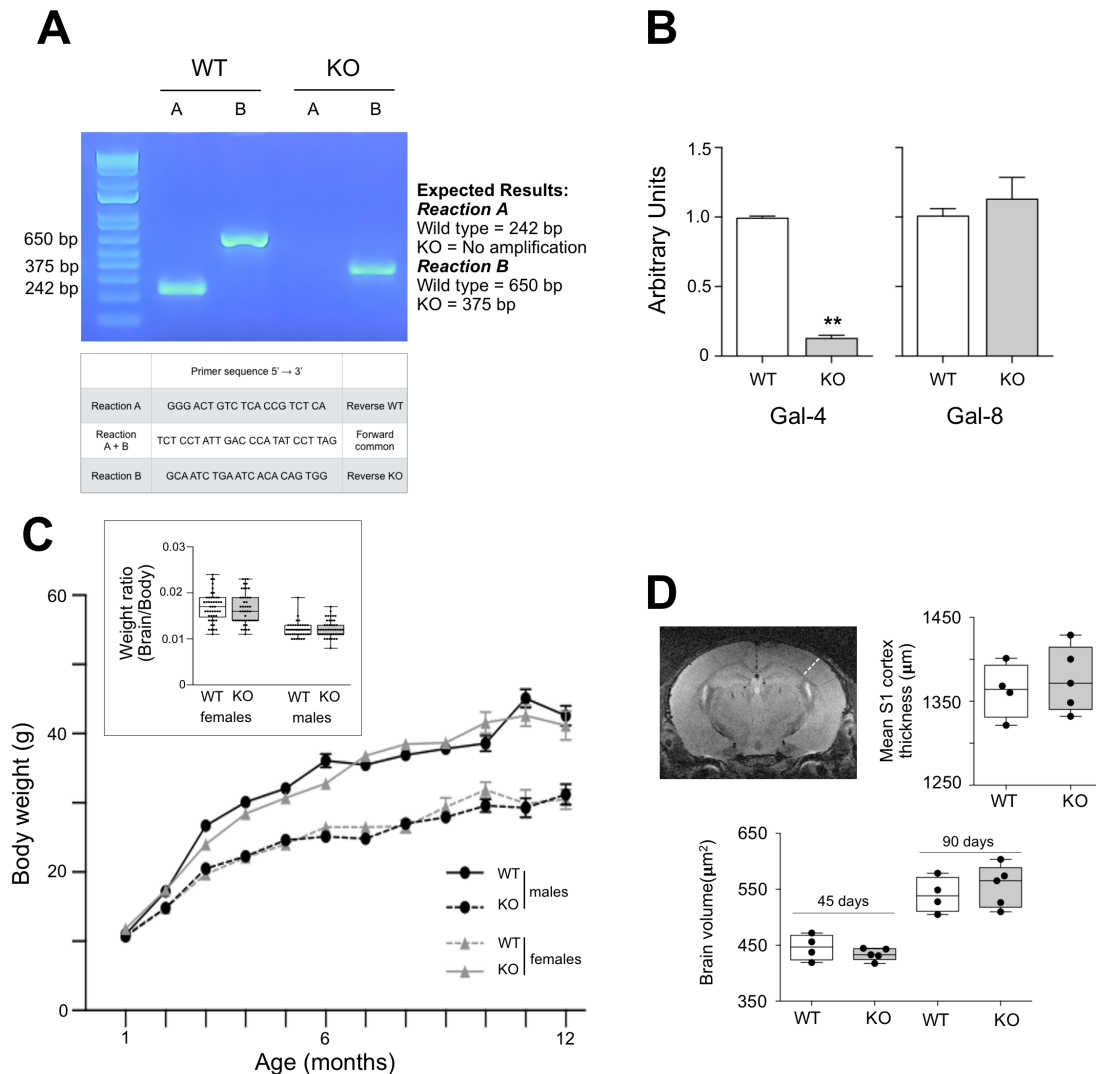

## Supplementary Figure S1

Lgals4-KO mice characterization. (A) Representative genotyping of wild type C57BL/6NJ mice (WT) and C57BL/6NJ-Lgals4em1(IMPC)J/J mice (KO). (B) Expression of galectins 4 and 8 in brain cortex of both mice strains measured by RT-PCR (values are means + SEM,  $n=5$ ,  $**p<0.01$  Student's t-test). (C) Mice body weight evolution with age segregated by gender and strain. No significant differences were observed when comparing mice strains by two-way ANOVA analysis (values are means  $\pm$  SEM; WT: females  $n=151$ , males  $n=158$ ; KO: females  $n=169$ , males  $n=150$ ). The inset displays the brain weight/body weight ratio of animals aged from 3 to 12 months. Data are arranged as a min. to max. box plot (WT and KO females  $n=46$ , WT males  $n=48$ ; KO males  $n=49$ ). There are no differences between mice strains. (D) Comparative analysis of WT ( $n=4$ ) vs KO ( $n=5$ ) mice S1 cortex thickness and brain volume measured by NMR imaging. Data are arranged as a min. to max. box plot. No significant differences between groups were observed by Student's t-test.

## Supplementary Figure S2

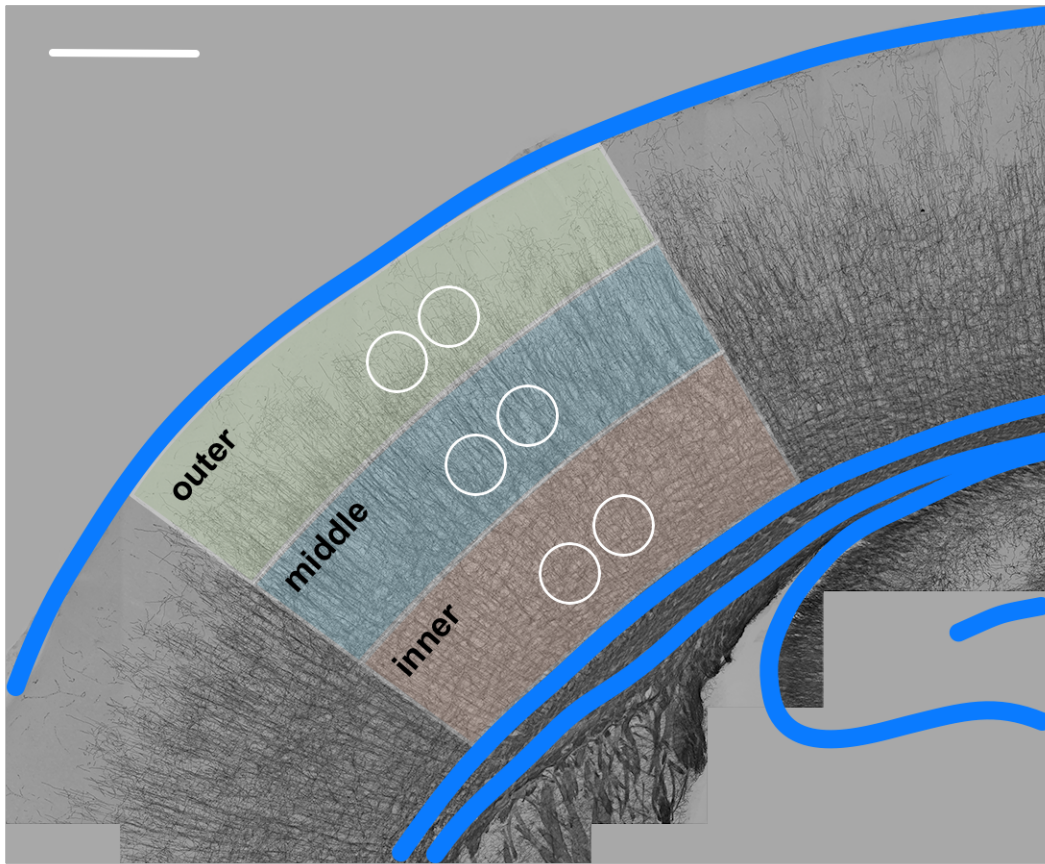

### Supplementary Figure S2

Somatosensory cortex segmentation for myelin analysis. Cortex of MBP-immunostained mice brain slices subdivided into three layers (Outer, Middle and Inner) of equal thickness according to increasing complexity of myelin fiber distribution. A similar division was used with Olig2 and PLP1-immunostained tissue in order to quantify the segmented expression of myelin markers as shown in Fig. 3. White circles are representative examples of selected ROIs used for myelin complexity studies shown in Fig. 4. (Scale bar 500  $\mu\text{m}$ ).

## Supplementary Figure S3

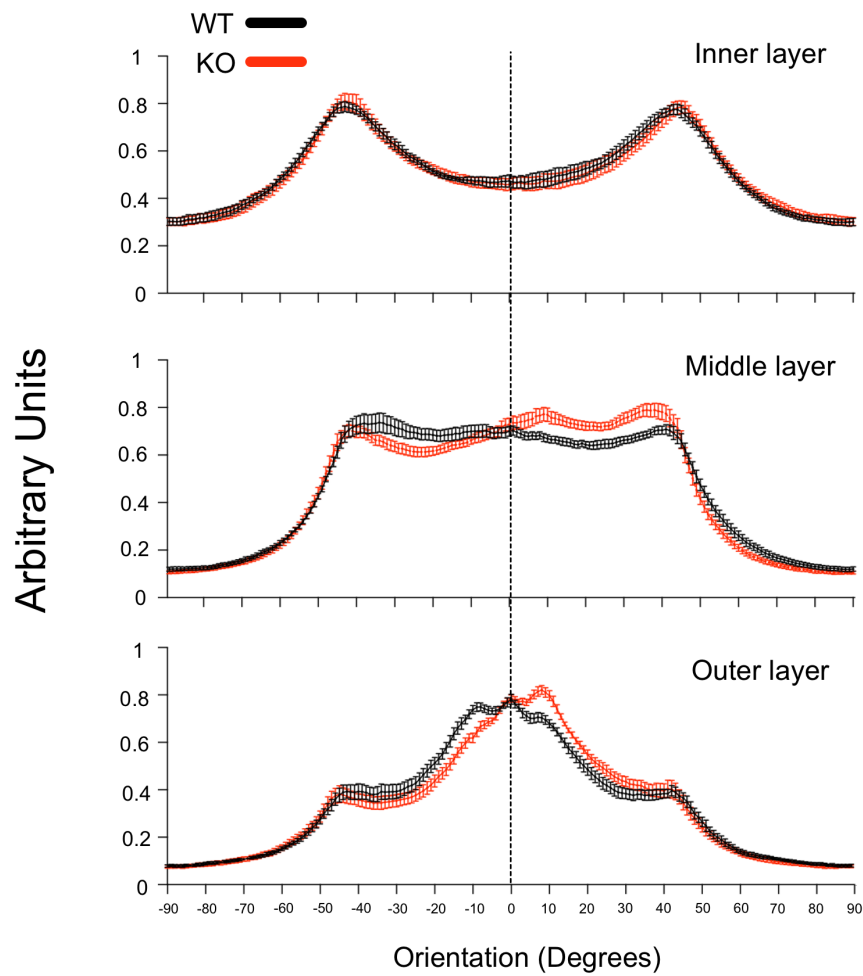

### Supplementary Figure S3

Mean normalized distribution of myelinated fiber orientations for the inner layer (upper panel), middle layer (middle panel), and outer layer (bottom panel) of the somatosensory cortex of WT and Lgals4-KO mice. Normalized frequencies are shown at 1 degree intervals. Data are means + SEM (WT n=6; KO n=6). No significant differences between groups were observed in any of the three layers analyzed according to a two-way repeated measures ANOVA.

| Method                                               | Molecule                                    | G4D<br>localiz. |
|------------------------------------------------------|---------------------------------------------|-----------------|
| IP + proteomics                                      | Myosin IIb                                  | n.d.            |
|                                                      | <b>Drebrin E</b>                            | +               |
|                                                      | Tubulin $\beta$ 5                           | -               |
|                                                      | Cytoplasmatic Actin 2                       | -               |
| Co-immunofluorescence;<br>Nodes/paranodes<br>markers | <b>Caspr</b>                                | +               |
|                                                      | <b>Contactin 1</b>                          | +               |
|                                                      | Neurofascin 186                             | -               |
|                                                      | Sodium channels (Pan-Nav)                   | -               |
| Co-immunofluorescence;<br>Anionic glycoconjugates    | <b>Heparan sulfate Proteoglycan (mixed)</b> | +               |
|                                                      | Chond. sulfate proteoglycan (mixed)         | -               |
|                                                      | Chond. sulfate A/C (4[6]- monosulfate)      | -               |
|                                                      | <b>Chond. sulfate D/E (4,6- disulfate)</b>  | +               |
|                                                      | Neuroglycan-C (CSPG5; mixed chond. sulfate) | -               |
|                                                      | HNK1                                        | -               |
|                                                      | PSA-NCAM*                                   | -               |
| Raft proteomics                                      | <b>VDAC1 (porin)</b>                        | +               |
|                                                      | $\alpha$ -internexin                        | -               |
|                                                      | Mitochondrial 60KDa HSP                     | n.d.            |
|                                                      | Dihydropyrimidase-related prot. 2           | n.d.            |

**Supplementary Table S1.** Potential components of the NMSs. Several methods were used to identify molecular candidates to be components of the NMSs: i) Crosslinking and immunoprecipitation (IP) and proteomic analysis. Membrane molecules from cultured cortical neurons were crosslinked with reversible crosslinkers that do not cross the plasma membrane. The postnuclear lysates obtained were immunoprecipitated with anti-Gal-4 antibodies and the immunoprecipitates were analyzed by LC-MS/MS (proteomics); ii) Co-localization by immunofluorescence of node/paranode components and anionic glycoconjugates with Gal-4 under non-permeabilizing conditions and, iii) Proteomic analysis of membrane raft fractions purified from neurons in culture by density gradients and chloroform/methanol precipitation. In the right column, those molecules whose expression co-localizes in the NMSs are indicated with “+” (Fig. 1A). (\*PSA-NCAM is highlighted in blue to indicate that it is expressed in axonal segments alternative to NMSs; Fig. 1A)

| Gen            | Reference     |
|----------------|---------------|
| Lgals4 G07     | Mm01179060_m1 |
| Lgals8         | Mm01332239_m1 |
| SOX10          | Mm00569909_m1 |
| MAL            | Mm01339780_m1 |
| MBP            | Mm01266402_m1 |
| Olig2          | Mm01210556_m1 |
| PLP1           | Mm01297210_m1 |
| GAPDH          | Mm99999915_g1 |
| $\beta$ -Actin | Mm02619580_g1 |

**Supplementary Table S2.** TaqMan probes (Applied Biosystems) used in expression measurements by RT-PCR. All probes were conjugated to fluorescein amidite (FAM) fluorophore .

| Antigen                          | Host | Clone      | Cat. No.  | Source                     | IHQ/IF/IC<br>working<br>dilution | WB<br>working<br>dilution |
|----------------------------------|------|------------|-----------|----------------------------|----------------------------------|---------------------------|
| Beta-Actin                       | M    | AC-15      | sc-69879  | Santa Cruz                 |                                  | 1/10000                   |
| Caspr                            | G    | Polyclonal | sc-11174  | Santa Cruz                 | 1/200                            |                           |
| CS-D/E                           | M    | MO-225     | AMS.A2872 | AMSBIO                     | 1/100                            |                           |
| CS-A/C                           | M    | CS-56      | C8035     | Sigma                      | 1/100                            |                           |
| Drebrin E                        | R    | EPR12634   | Ab178408  | Abcam                      | 1/200                            |                           |
| Galectin-4                       | M    | B-9        | sc-271533 | Santa Cruz                 | 1/200                            |                           |
| Galectin-4                       | M    | E-2        | sc-271209 | Santa Cruz                 | 1/200                            |                           |
| Galectin-4                       | R    | Polyclonal |           | provided by<br>Gabius H.J. | 1/200                            |                           |
| GAPDH                            | M    | 6C5        | MAB374    | Merck<br>Millipore         |                                  | 1/10000                   |
| HNK1                             | M    | TB01       | M7271     | Dako                       | 1/200                            |                           |
| HS                               | M    | F58-10E4   | 370255    | AMSBIO                     | 1/100                            |                           |
| MAG                              | G    | Polyclonal | Sc-9544   | Santa Cruz                 |                                  | 1/1000                    |
| MBP                              | Rt   | 12         | Ab7349-1  | Abcam                      | 1/200                            | 1/1000                    |
| MOG                              | R    | E5K6T      | 96457     |                            |                                  | 1/1000                    |
| Na <sup>+</sup> channel<br>(PAN) | M    | K58/35     | S8809     | Sigma                      | 1/200                            |                           |
| Neuroglycan-C                    | G    | Polyclonal | AF5665    | RD Systems                 | 1/200                            |                           |
| Neurofascin-<br>186              | M    | A12/18     | 75-172    | NeuroMab                   | 1/200                            |                           |
| Olig2                            | M    | 211F1.1    | MABN50    | Merck<br>Millipore         | 1/500                            | 1/2000                    |
| PLP1                             | R    | E9V1       | 28702S    | Cell Signaling             | 1/200                            |                           |
| PSA-Ncam                         | M    | 2-2B       | MAB5324   | Merck<br>Millipore         | 1/200                            |                           |
| βIII-Tub (Tuj1)                  | M    | 2G10       | T8578     | Sigma                      | 1/1000                           | 1/5000                    |
| VDAC1                            | R    | D73D12     | 4661      | Cell Signaling             | 1/200                            |                           |
| M-IgG Alexa<br>Fluor 488         | D    |            | A21202    | Invitrogen                 | 1/500                            |                           |
| R-IgG Alexa<br>Fluor 488         | D    |            | A21206    | Invitrogen                 | 1/500                            |                           |
| M-IgG Alexa<br>Fluor 594         | D    |            | A21203    | Invitrogen                 | 1/500                            |                           |
| G-IgG Alexa<br>Fluor 488         | D    |            | A11055    | Invitrogen                 | 1/500                            |                           |

|                          |   |         |               |        |
|--------------------------|---|---------|---------------|--------|
| R-IgG Alexa<br>Fluor 594 | D | A21207  | Invitrogen    | 1/500  |
| R-IgG<br>biotinylated    | G | BA-1000 | Vector        | 1/500  |
| Rat-IgG<br>biotinylated  | G | 629540  | Zymed         | 1/500  |
| M-IgG HRP                | S | NA931V  | GE Healthcare | 1/5000 |
| R-IgG HRP                | D | NA-934V | GE Healthcare | 1/5000 |
| G-IgG HRP                | R | A8919   | Sigma         | 1/5000 |
| Rat-IgG HRP              | R | A9542   | Sigma         | 1/5000 |

---

**Supplementary Table S3.** Detailed information about primary and secondary antibodies used for immunohistochemistry (IHQ), immunohistofluorescence (IF), immunocitochemistry (IC) and western blot (WB). M, mouse; R, rabbit; Rt, rat; D, donkey; H, horse; S, sheep; G, goat.
